# Supplementary material
Source: PubMed Central journal article supplement (PMC3375906)
Supplement: NIHMS362541-supplement-02.pdf [file NIHMS362541-supplement-02.pdf]

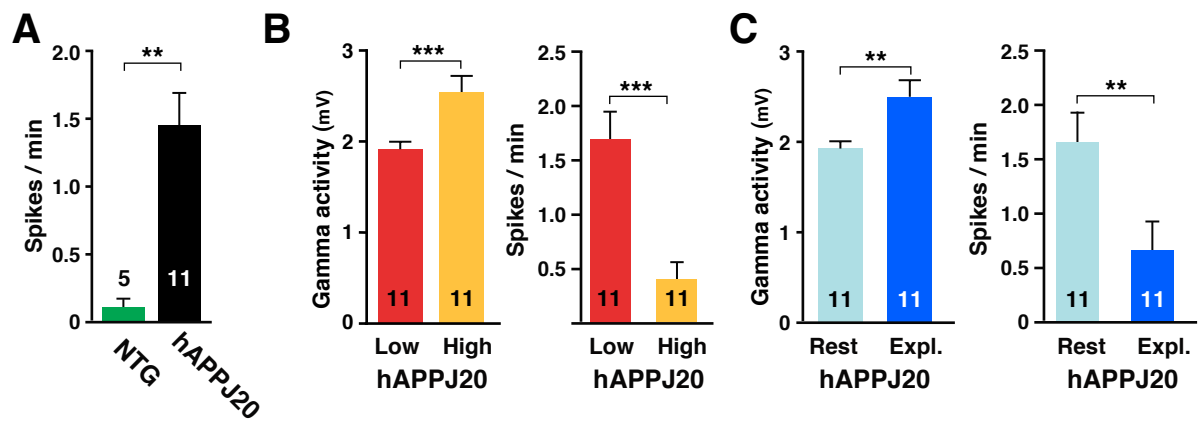

Figure S1

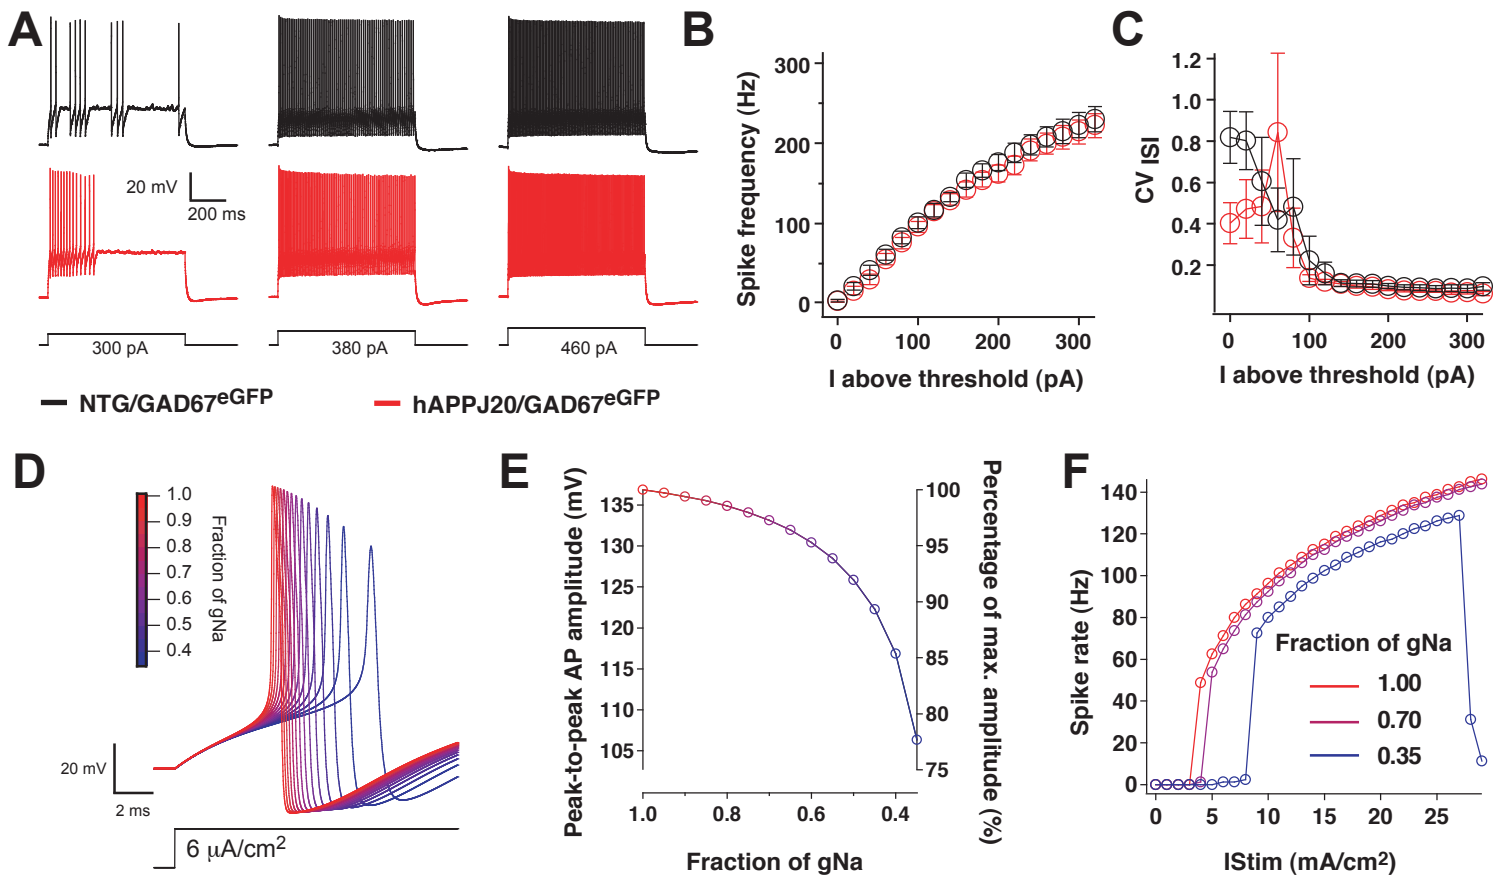

Figure S2

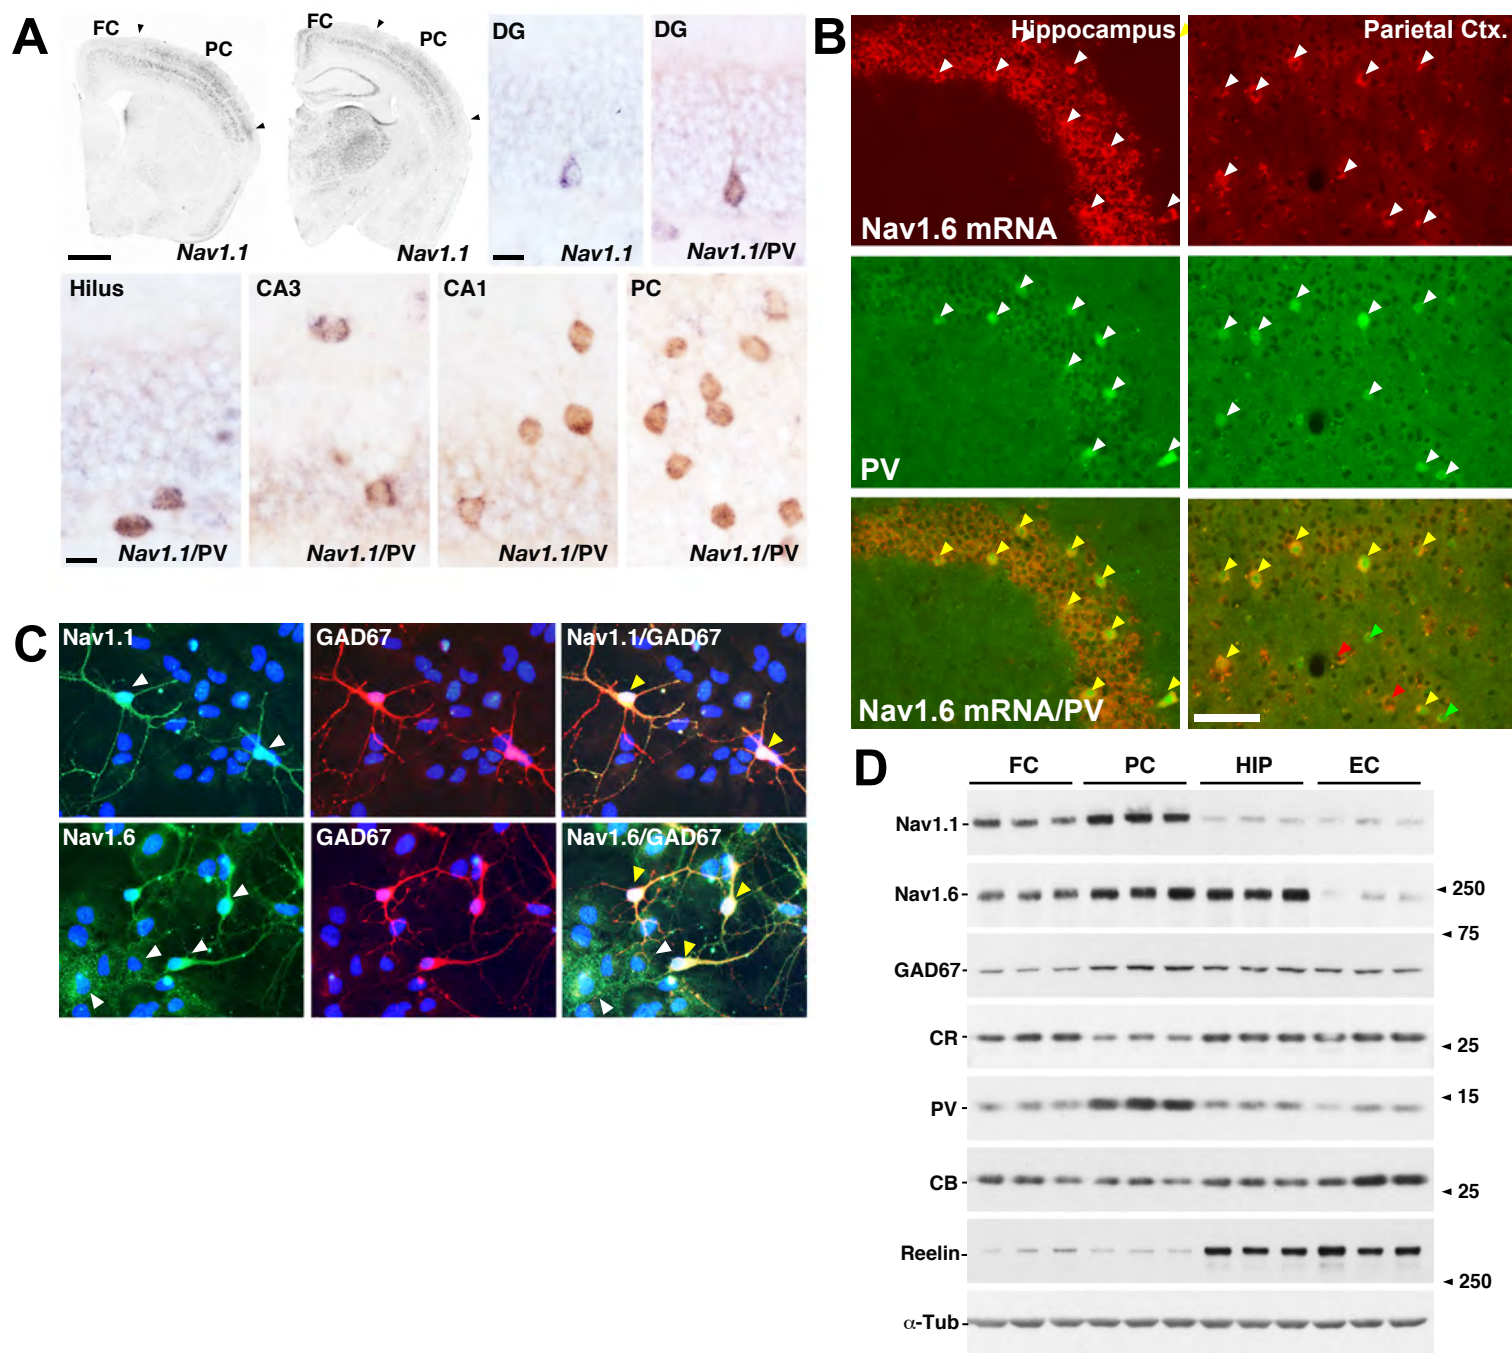

Figure S3

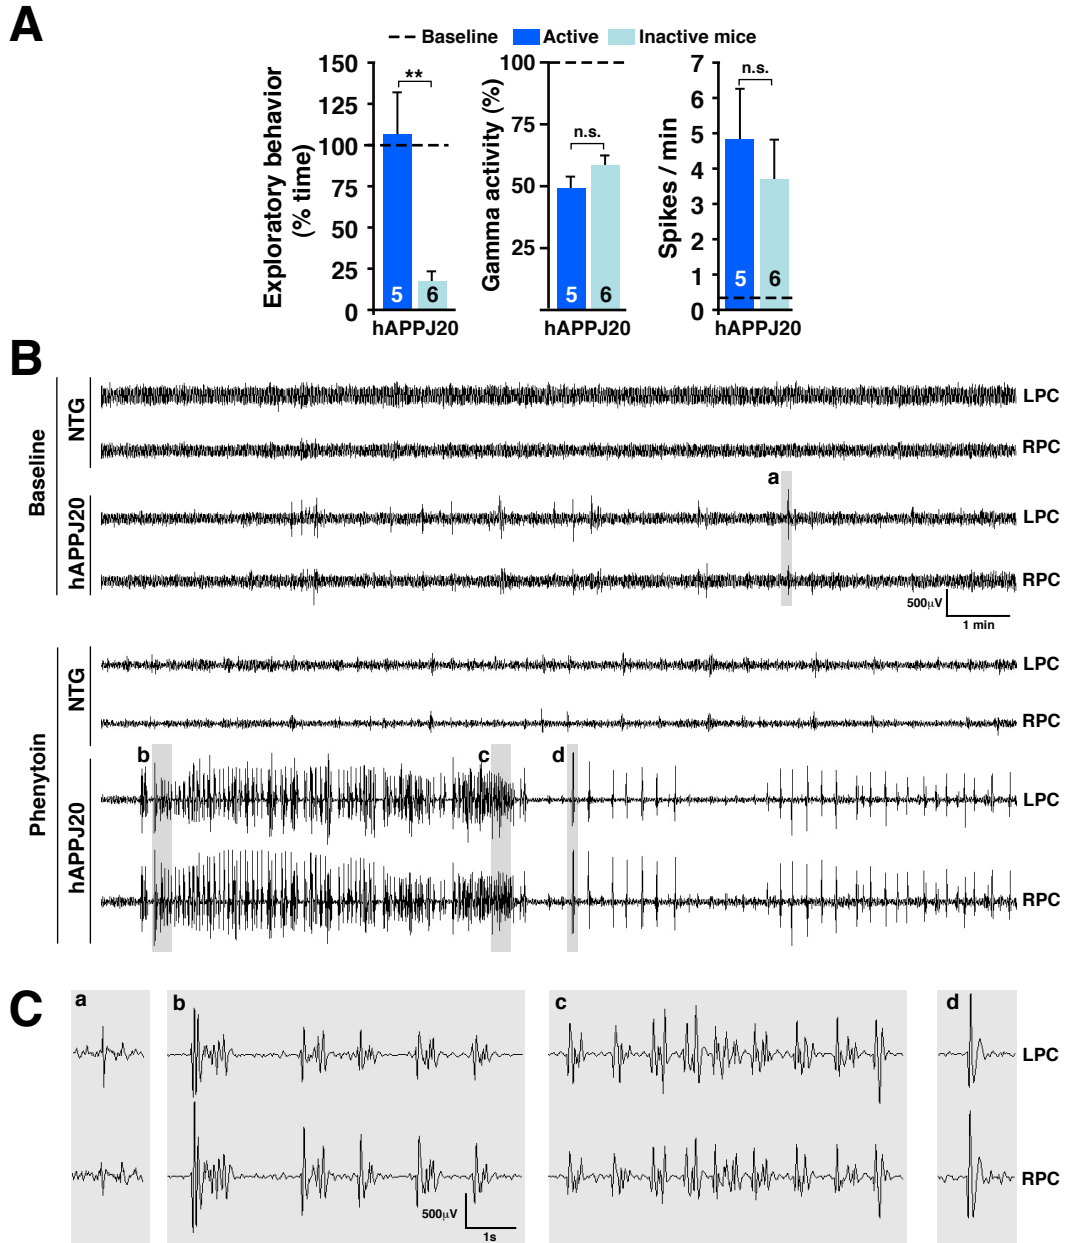

Figure S4



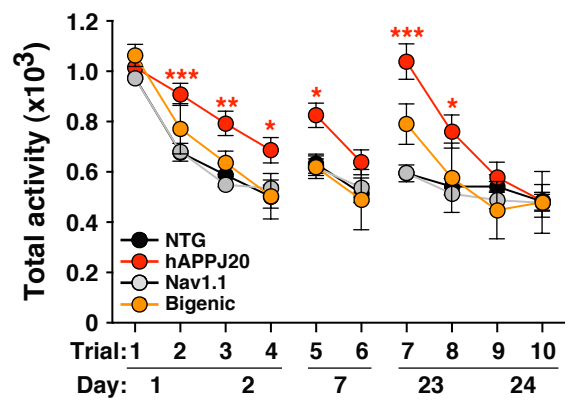

Figure S5

| Measurement                                       | NTG/GAD67 <sup>eGFP</sup> | hAPPJ20/GAD67 <sup>eGFP</sup> | p value |
|---------------------------------------------------|---------------------------|-------------------------------|---------|
| AP amplitude at -70mv (mV)<br>(threshold to peak) | 64.76 ± 1.38              | 57.23 ± 1.62                  | 0.002*  |
| AP amplitude at -70mv (mV)<br>(peak to AHP)       | 87.25 ± 1.50              | 79.11 ± 1.21                  | 0.001*  |
| AP amplitude at RMP (mV)<br>(peak to AHP)         | 86.9 ± 1.5                | 79.3 ± 3.0                    | 0.025*  |
| AP half width (ms)                                | 0.28 ± 0.01               | 0.29 ± 0.01                   | 0.522   |
| Ri(MΩ)                                            | 147.69 ± 16.35            | 165.27 ± 22.38                | 0.983   |
| Cm (pF)                                           | 56.44 ± 3.57              | 56.31 ± 4.58                  | 0.792   |
| Membrane time constant<br>(ms)                    | 7.70 ± 0.31               | 8.45 ± 0.50                   | 0.189   |
| RMP (mV)                                          | -66.83 ± 0.92             | -60.37 ± 1.34                 | <0.001* |
| Threshold current (pA)                            | 160.00 ± 15.69            | 160.00 ± 21.29                | 0.967   |
| Threshold current (pA/pF)                         | 2.86 ± 0.21               | 2.76 ± 0.23                   | 0.690   |

| Measurement              | NTG/Pyr     | hAPPJ20/Pyr | p value |
|--------------------------|-------------|-------------|---------|
| RMP (mV)                 | -70.5 ± 0.5 | -71.3 ± 0.9 | 0.50    |
| AP amplitude at RMP (mV) | 94.9 ± 2.2  | 92.9 ± 1.6  | 0.47    |

AHP, afterhyperpolarization; Cm, membrane capacitance; Ri, input resistance; RMP, resting membrane potential. Quantitative data represent mean ± SEM. \*p<0.05 by Student's t test.

**Table S1**
